# Supplementary material for: Do an ecosystem engineer and environmental gradient act independently or in concert to shape juvenile plant communities? Tests with the leaf-cutter antAtta laevigatain a Neotropical savanna
Source: PeerJ journal article supplement (doi:10.7717/peerj.5612), 2018-10-09

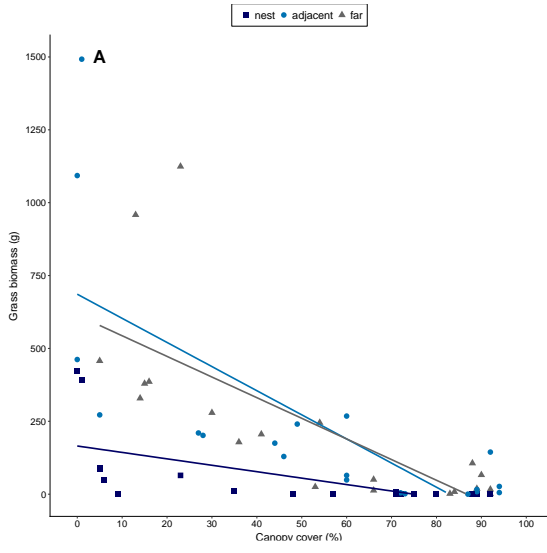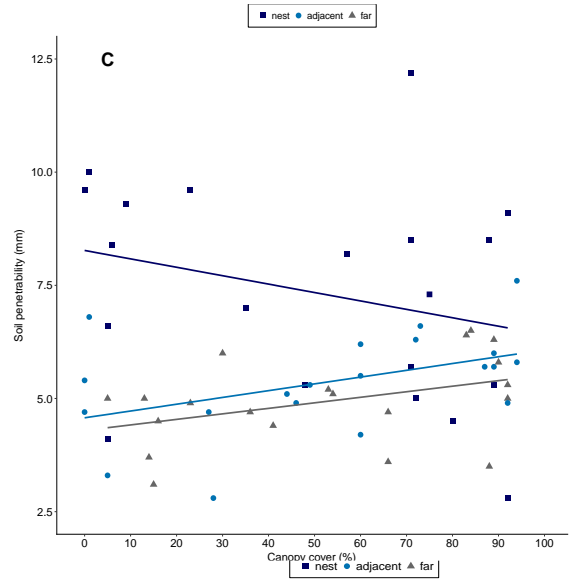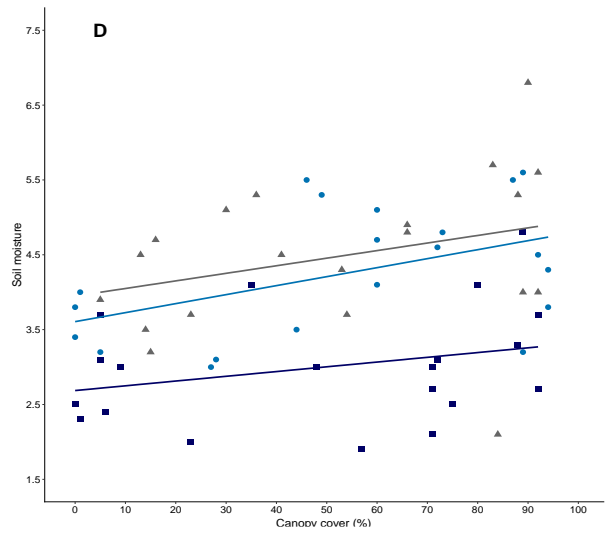

Supplement: Costa_etal_MS_PeerJ_Appendix_D_19July2018.pdf [file Costa_etal_MS_PeerJ_Appendix_D_19July2018.pdf]
